# Supplementary material for: Complexes of carbon dioxide with dihalogenated ethylenes: structure, stability and interaction
Source: Royal Society of Chemistry journal article supplement (doi:10.1039/c6ra03558b), 2016-01-01
Supplement: c6ra03558b1.pdf [file c6ra03558b1.pdf]

## Complexes of Carbon Dioxide with Dihalogenated Ethylenes: Structure, Stability and Interaction

Nguyen Tien Trung,<sup>a\*</sup> Nguyen Thi Thu Trang,<sup>c</sup> Vu Thi Ngan,<sup>a</sup> Duong Tuan  
Quang<sup>b</sup> and Minh Tho Nguyen<sup>d</sup>

<sup>a</sup> Faculty of Chemistry and Laboratory of Computational Chemistry and  
Modelling, Quy Nhon University, Quy Nhon, Vietnam

<sup>b</sup>Department of Chemistry - Hue University of Education, Hue, Vietnam

<sup>c</sup>Faculty of Science, Hai Phong University, Hai Phong, Vietnam

<sup>d</sup>Department of Chemistry, KU Leuven, B-3001 Leuven, Belgium

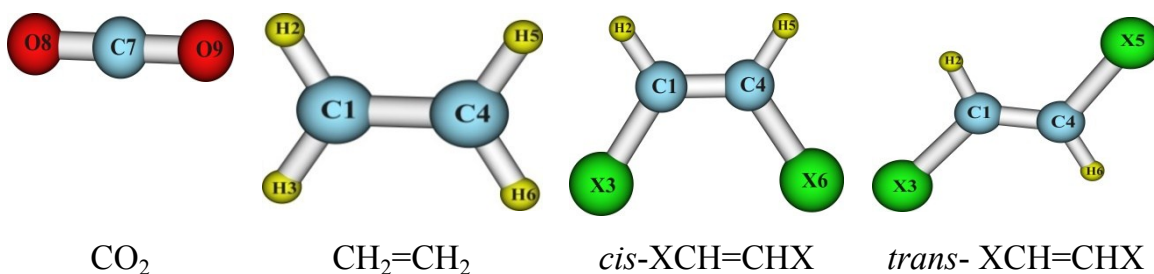

**Figure S1.** Stable structures of CH<sub>2</sub>=CH<sub>2</sub>, *cis*-XCH=CHX and *trans*-XCH=CHX  
(X = F, Cl, Br), and CO<sub>2</sub>

**Table S1.** Selected parameters of C<sub>2</sub>H<sub>4</sub> and CO<sub>2</sub> at MP2/aug-cc-pVDZ

| Monomers                                                                          | C <sub>2</sub> H <sub>4</sub> |                          | Monomer  | CO <sub>2</sub>          |                          |
|-----------------------------------------------------------------------------------|-------------------------------|--------------------------|----------|--------------------------|--------------------------|
|                                                                                   | Calculated <sup>a)</sup>      | Experiment <sup>b)</sup> |          | Calculated <sup>a)</sup> | Experiment <sup>b)</sup> |
| ∠H <sub>2</sub> C <sub>1</sub> H <sub>3</sub>                                     | 117.4°                        | 117.6°                   | ∠O8C7O9  | 180                      | 180                      |
| ∠H <sub>2</sub> C <sub>1</sub> C <sub>4</sub>                                     | 121.3°                        | 121.2°                   | C7O8(O9) | 1.180                    | 1.162                    |
| r(C <sub>1</sub> -C <sub>4</sub> )                                                | 1.35 Å                        | 1.339 Å                  |          |                          |                          |
| r(C <sub>1</sub> -H <sub>2(3)</sub> ) or<br>r(C <sub>4</sub> -H <sub>5(6)</sub> ) | 1.09 Å                        | 1.086 Å                  |          |                          |                          |

a) Results calculated at the MP2/aug-cc-pVDZ level of theory

b) Experimental results taken from <http://webbook.nist.gov/chemistry> and <http://cccbdb.nist.gov>

**Table S2.** Selected parameters of *cis*-XCH=CHX and *trans*-XCH=CHX (X=F, Cl, Br) at MP2/ aug-cc-pVDZ and corresponding experimental results

|                           |                                               | XCH=CHX, with X= F, Cl, Br |        |         |                          |         |    |
|---------------------------|-----------------------------------------------|----------------------------|--------|---------|--------------------------|---------|----|
|                           |                                               | Calculated <sup>a)</sup>   |        |         | Experiment <sup>b)</sup> |         |    |
|                           |                                               | F                          | Cl     | Br      | F                        | Cl      | Br |
| <i>cis</i> -<br>XCH=CHX   | ∠C <sub>1</sub> C <sub>4</sub> X <sub>3</sub> | 122.3°                     | 124.3° | 125.1°  | 121.1°                   | 124.2°  | -  |
|                           | ∠H <sub>2</sub> C <sub>1</sub> C <sub>4</sub> | 122.7°                     | 126.6° | 120.2°  | 124.0°                   | 123.2°  | -  |
|                           | R(C <sub>1</sub> -C <sub>4</sub> )            | 1.34 Å                     | 1.35 Å | 1.35 Å  | 1.324 Å                  | 1.317 Å | -  |
|                           | R(C <sub>1</sub> -H <sub>2</sub> )            | 1.09 Å                     | 1.09 Å | 1.09 Å  | 1.089 Å                  | 1.101 Å | -  |
|                           | R(C <sub>1</sub> -X <sub>3</sub> )            | 1.36 Å                     | 1.73 Å | 1.88 Å  | 1.335 Å                  | 1.717 Å | -  |
| <i>trans</i> -<br>XCH=CHX | ∠C <sub>1</sub> C <sub>4</sub> X <sub>3</sub> | 119.5°                     | 120.9° | 121.01° | 119.3°                   | 123.8°  | -  |
|                           | ∠H <sub>2</sub> C <sub>1</sub> C <sub>4</sub> | 125.8°                     | 123.9° | 124.0°  | 129.2°                   | -       | -  |
|                           | R(C <sub>1</sub> -C <sub>4</sub> )            | 1.34 Å                     | 1.35 Å | 1.35 Å  | 1.329 Å                  | 1.354 Å | -  |
|                           | R(C <sub>1</sub> -H <sub>2</sub> )            | 1.09 Å                     | 1.09 Å | 1.09 Å  | 1.080 Å                  | 1.075 Å | -  |
|                           | R(C <sub>1</sub> -X <sub>3</sub> )            | 1.36 Å                     | 1.74 Å | 1.89 Å  | 1.344 Å                  | 1.718 Å | -  |

a) Results calculated at the MP2/aug-cc-pVDZ level of theory

b) Experimental results taken from <http://webbook.nist.gov/chemistry> and <http://cccbdb.nist.gov>

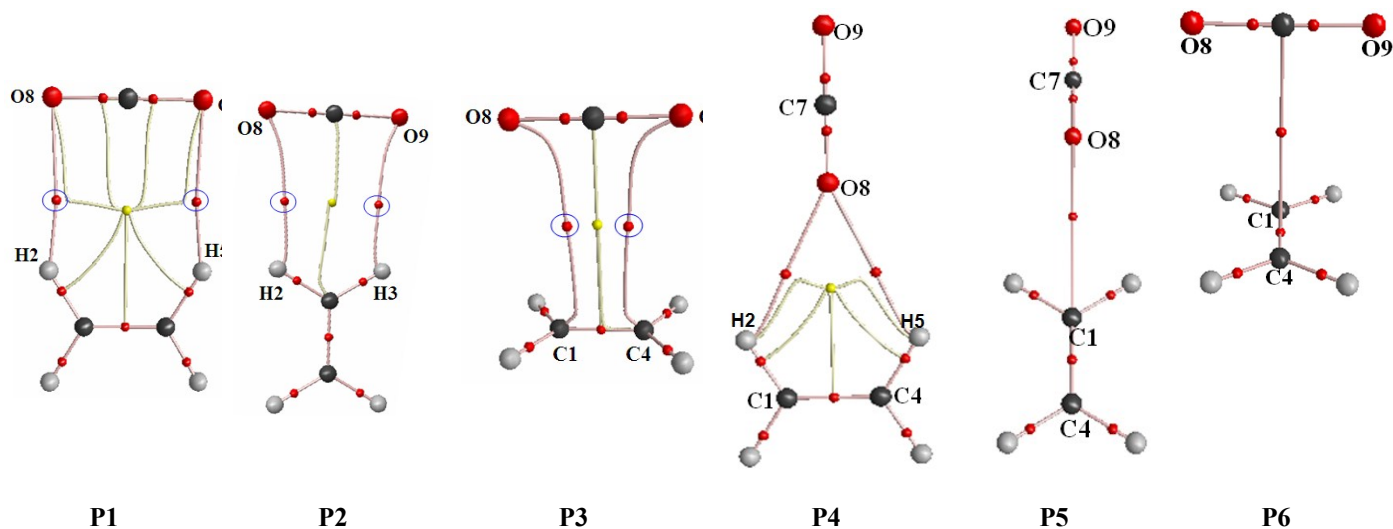

**Figure S2.** Topological analysis of complexes of ethylene and CO<sub>2</sub>

**The Cartesian coordinates for all optimized structures:**

**P1**

C,0.1854712686,0.,0.1540951812  
H,0.2112045779,0.,0.9386848353  
H,1.146649709,0.,-0.6747647379  
C,-0.9786033701,0.,-0.8373315602  
H,-0.9926314741,0.,-1.9303841636  
H,-1.9452506848,0.,-0.3270146622  
C,-2.2410988948,0.,2.6469382356  
O,-1.2230374803,0.,3.2441205219  
O,-3.2588514152,0.,2.0492296662

**P2**

C,-0.3398854535,0.,-0.1801290663  
H,-0.2794666821,0.,0.9115606076  
H,0.5974276309,0.,-0.7430508671  
C,-1.5320557283,0.,-0.811943453  
H,-1.5965266244,0.,-1.903029517  
H,-2.4711443444,0.,-0.2527137447  
C,2.6879219941,0.,1.4245178084

O,3.2401317655,0.,0.3814720058

O,2.1348173133,0.,2.4670893358

**P3**

C,0.,0.6750909606,-1.8955517327

H,-0.9331241184,1.244413106,-1.8963001371

H,0.9331241184,1.244413106,-1.8963001371

C,0.,-0.6750909606,-1.8955517327

H,0.9331241184,-1.244413106,-1.8963001371

H,-0.9331241184,-1.244413106,-1.8963001371

C,0.,0.,1.3389044164

O,0.,1.1801049325,1.3451074592

O,0.,-1.1801049325,1.3451074592

**P4**

C,0.0528093217,0.,0.3495602401

H,0.0892935937,0.,1.4335691445

H,0.8412165674,0.,-0.2785664052

C,-1.2861676704,0.,-0.1972114628

H,-1.4210571764,0.,-1.2814762801

H,-2.1848477101,0.,0.4253981498

C,1.1684520307,0.,-4.0696862717

O,0.6899418507,0.,-2.9903061166

O,1.6466046832,0.,-5.1482599483

**P5**

C,0.5810198971,0.,0.2837897041

H,0.6823329061,0.,1.3722584686

H,1.5017873994,0.,-0.3054604838

C,-0.6313856913,0.,-0.3083900562

H,-0.73536888,0.,-1.3960369461

H,-1.5531465178,0.,0.2782488783

C,-4.6504570459,0.,-2.2714399909

O,-3.5895701677,0.,-1.7532670765

O,-5.7106453654,0.,-2.7892717057

**P6**

C,0.5834169723,1.8633212391,0.3516731869

H,0.5864230886,1.8632461456,1.4449712618

H,1.5515896975,1.8632461455,-0.1562158674

C,-0.5729341053,1.8677506122,-0.3453543047

H,-0.5759301917,1.8713955557,-1.4386463338

H,-1.5410968006,1.8713955558,0.1625407954

C,-0.0037963911,-1.3512150885,-0.0022883958

O,-0.6129907978,-1.3592764987,1.0082985755

O,0.6053527167,-1.3592764988,-1.0129026724

**CIF**

C,0.0144779645,0.,0.0156281212

H,-0.0123437014,0.,1.1047894447

C,1.1551990131,0.,-0.6905232935

H,2.1420420942,0.,-0.2288605122  
C,2.4758686328,0.,2.7173333631  
O,1.4687444277,0.,3.3329667398  
O,3.4759966391,0.,2.0903982868  
F,1.162046773,0.,-2.0458970064  
F,-1.2017390298,0.,-0.5826201689

**C1Cl**

C,0.0041701582,0.,0.0060846392  
H,0.0194844086,0.,1.0972302074  
C,1.15125324,0.,-0.7040051255  
H,2.1210834568,0.,-0.2037426665  
C,2.4573588929,0.,2.6874326231  
O,1.4504311644,0.,3.3034861698  
O,3.4577753724,0.,2.0608607673  
Cl,-1.5752294977,0.,-0.6988318214  
Cl,1.2245723499,0.,-2.4320198237

**C1Br**

C,0.0048860236,0.,0.0076216487  
H,0.0253705153,0.,1.0994410417  
C,1.1523097684,0.,-0.7026789998  
H,2.1204376369,0.,-0.1974883115  
C,2.4472125173,0.,2.6710421097  
O,1.440377007,0.,3.2872692383  
O,3.4477432447,0.,2.0446301985  
Br,-1.7202825145,0.,-0.7340822517  
Br,1.2577014072,0.,-2.5775720003

**C2F**

C,0.098290423,0.,-0.0467639623  
H,0.0572252801,0.,1.0409991155  
C,1.2431996318,0.,-0.7435513969  
H,2.222496724,0.,-0.2667825431  
F,1.2661856901,0.,-2.0985920658  
F,-1.1149526355,0.,-0.6616455785  
O,-4.0971400844,0.,0.5661730906  
O,-2.305075095,0.,2.1015218299  
C,-3.198190437,0.,1.3277273734

**C2Cl**

C,0.0465603302,0.,-0.2459222465  
H,-0.1170779804,0.,0.8327587811  
C,1.2907012079,0.,-0.7643914679  
H,2.1629252738,0.,-0.1082453366  
O,-4.3022777336,0.,0.9476443133  
O,-2.2491570426,0.,2.1115129838  
C,-3.2740683466,0.,1.5233877185  
Cl,-1.4011070128,0.,-1.1978252368

Cl,1.6446075219,0.,-2.4572410749

**C2Br**

C,0.0338289095,0.,-0.2950196525

H,-0.147016542,0.,0.7818800483

C,1.289125156,0.,-0.7869561586

H,2.1435774264,0.,-0.1063460299

O,-4.3462653019,0.,1.0741923454

O,-2.2303639496,0.,2.1197131645

C,-3.2865806654,0.,1.5898328642

Br,1.7377979992,0.,-2.6103420652

Br,-1.5301656982,0.,-1.3389163006

**C3F**

C,0.0230785549,0.,0.0300687748

H,-0.0073276071,0.,1.1178695375

C,1.1721354417,0.,-0.660359876

H,2.1468848115,0.,-0.1765224032

C,2.8806834838,0.,3.4845008803

O,2.2721008555,0.,2.471657541

O,3.4875817765,0.,4.4945410374

F,-1.1884689444,0.,-0.5809869181

F,1.201382639,0.,-2.0169663054

**C3Cl**

C,0.0130672286,0.,0.0204749048

H,0.0266250681,0.,1.1107112772

C,1.1683644944,0.,-0.6737033745

H,2.1246248186,0.,-0.14990441

C,2.86241731,0.,3.4541011094

O,2.2537955176,0.,2.4411925906

O,3.46931502,0.,4.4641402967

Cl,1.2688290879,0.,-2.4013894835

Cl,-1.5595595228,0.,-0.7019083222

**C3Br**

C,0.0117078374,0.,0.0185317085

H,0.0325748337,0.,1.1095227497

C,1.1672869342,0.,-0.6758159133

H,2.120782199,0.,-0.1452090311

C,2.8561344347,0.,3.443644734

O,2.2475092956,0.,2.4307306454

O,3.4630447695,0.,4.4537049323

Br,1.3028149279,0.,-2.5495041736

Br,-1.7062927013,0.,-0.7414351874

**T1F**

C,0.0523383018,0.,0.0579259512

H,0.0148046354,0.,1.1464104296

C,1.1620210044,0.,-0.6934036951  
H,1.1939457221,0.,-1.7819460897  
C,-1.6883758623,0.,-3.4053904322  
O,-2.851750847,0.,-3.2188612519  
O,-0.5237625187,0.,-3.6040297252  
F,-1.1720058402,0.,-0.5499623791  
F,2.379617392,0.,-0.0824811909

**T1Cl**

C,0.0679386463,0.,0.2123483207  
H,0.2083323572,0.,1.2943563721  
C,1.0742902861,0.,-0.6807544787  
H,0.9316621089,0.,-1.7617702278  
C,-1.6779783556,0.,-3.6426027895  
O,-2.8556985545,0.,-3.5967299347  
O,-0.4979391506,0.,-3.6975455105  
Cl,-1.594005322,0.,-0.3132435243  
Cl,2.7304498475,0.,-0.147239164

**T1Br**

C,0.0018059378,0.,0.019499926  
H,0.0772886533,0.,1.1082744074  
C,1.0578451204,0.,-0.8139186491  
H,0.9816542175,0.,-1.9018911112  
C,-1.3978440174,0.,-4.0596000563  
O,-2.5717953368,0.,-4.1650859384  
O,-0.2203768425,0.,-3.9644041236  
Br,2.8218207059,0.,-0.1360004412  
Br,-1.7683210304,0.,-0.6504946392

**T2F**

C,0.057930031,0.,-0.0378184635  
H,-0.0325375737,0.,1.0474030586  
C,1.1971554483,0.,-0.742885548  
H,1.2732567655,0.,-1.8296805137  
C,-3.303906116,0.,1.1910977428  
O,-2.4484787661,0.,2.0060133055  
O,-4.165498647,0.,0.3871439611  
F,-1.1357495543,0.,-0.7043561594  
F,2.3916240095,0.,-0.0892245317

**T2Cl**

C,0.020238234,0.,-0.1998662246  
H,-0.2060020543,0.,0.8673179068  
C,1.2617214388,0.,-0.7180981786  
H,1.4764184503,0.,-1.7878809185  
C,-3.4179405778,0.,1.3562523559  
O,-2.4288124773,0.,2.0024648849  
O,-4.4105572755,0.,0.7207291225

Cl,-1.3756845504,0.,-1.2434724675

Cl,2.6589512317,0.,0.3176452182

**T2Br**

C,0.0327959773,0.,-0.1976349935

H,-0.1835811301,0.,0.8718721607

C,1.2682940436,0.,-0.7295647624

H,1.4738200545,0.,-1.8014004049

C,-3.3689568005,0.,1.5524667046

O,-2.3291743074,0.,2.113583257

O,-4.4120335238,0.,1.0036417285

Br,-1.4996542718,0.,-1.307652433

Br,2.800636363,0.,0.3754356635

**T3F**

C,-0.0438953229,-0.0801860048,0.0571809353

H,-0.0718959145,-0.0395817721,1.1453314631

C,1.0616148674,-0.0819871906,-0.7013460138

H,1.0895274594,-0.1187957422,1.7896338093

C,0.4354968404,3.0832709557,-0.4365189013

O,0.0085930236,3.1141398994,0.6632209604

O,0.8623545979,3.0543886784,-1.5363306091

F,-1.2660793983,-0.1211276172,-0.5440640578

F,2.2833760464,-0.0228048208,-0.1007606825

**T3Cl**

C,-0.0604253711,-0.0561775179,0.0370992941

H,-0.0936319659,-0.0146472142,1.1267886442

C,1.0769823928,-0.0558522893,-0.6830777654

H,1.1100551162,-0.0916083293,1.7729759369

C,0.4369840871,3.0191212711,-0.4341989828

O,0.0598734776,3.0518779757,0.6835844261

O,0.8140448969,2.9885125728,-1.5520600726

Cl,-1.6097604457,-0.0989087531,-0.7522690739

Cl,2.6253114793,0.0302701462,0.1047213959

**T3Br**

C,-0.0634006407,-0.0378464697,0.0322231252

H,-0.1075513742,0.0039295051,1.1218167994

C,1.0790978881,-0.0370990344,-0.6795427208

H,1.1230914763,-0.0720968736,1.7693815207

C,0.437123617,3.0131031944,-0.433981343

O,0.0940719834,3.0474907438,0.6946911988

O,0.780104743,2.981756842,-1.5627638672

Br,-1.7416401632,-0.0777128578,-0.8341750295

Br,2.75593158,0.0634049287,0.1846625263
